# Supplementary material for: Molecular Requirements for Peroxisomal Targeting of Alanine-Glyoxylate Aminotransferase as an Essential Determinant in Primary Hyperoxaluria Type 1
Source: PLoS Biol. 2012 Apr 17;10(4):e1001309. doi: 10.1371/journal.pbio.1001309 (PMC3328432; doi:10.1371/journal.pbio.1001309)
Supplement: Table S3 — Estimated secondary structure content of purified AGT variants. (DOC) [file pbio.1001309.s010.doc]

**Table S3: Estimated secondary structure content of purified AGT variants.**

**Protein Helix [%] Strand [%] Turns [%] Unordered [%]**

wt 35  3 19  3 20  2 25  2

A328W 32  1 18  1 20  0 29 1

Y330A 24  10 22  5 25  2 29  2

Y330W 36  3 19  1 19  0 25  3

G170R 38  2 19  7 18  3 26  7

V336D 31  3 24  3 20  2 25  5
